# 1 Quantitative analysis of the splice variants expressed by the major hepatitis B virus 2 genotypes

3

4 Chun Shen Lim<sup>a</sup>, Vitina Sozzi<sup>b</sup>, Peter A. Revill<sup>b,c^#</sup>, Chris M. Brown<sup>a^#</sup>

5

6 <sup>a</sup>Department of Biochemistry, School of Biomedical Sciences, University of Otago, Dunedin,  
7 New Zealand

8 <sup>b</sup>Victorian Infectious Diseases Reference Laboratory, Royal Melbourne Hospital, at the Peter  
9 Doherty Institute for Infection and Immunity, Melbourne, Victoria, Australia

10 <sup>c</sup>Department of Microbiology and Immunology, University of Melbourne, Melbourne, Victoria,  
11 Australia

12

13 **Running Head:** Quantitative analysis of the HBV splice variants

14

15 <sup>^</sup>Equal contributions.

16 <sup>#</sup>Address correspondence to Chris M. Brown, [chris.brown@otago.ac.nz](mailto:chris.brown@otago.ac.nz), or Peter A. Revill,  
17 [peter.revill@mh.org.au](mailto:peter.revill@mh.org.au)

18

19 Word count Abstract: 232 + 149

20 Word count Text: 3321

21

22

## 23 **ABSTRACT**

24 Hepatitis B virus (HBV) is a major human pathogen that causes liver diseases. The main HBV  
 25 RNAs are unspliced transcripts that encode the key viral proteins. Recent studies show that some  
 26 of the HBV spliced transcript isoforms are predictive of liver cancer, yet the roles of these  
 27 spliced transcripts remain elusive. Furthermore, a total of 9 major HBV genotypes were isolated  
 28 from discrete geographical regions of the world, it is likely that these genotypes may express a  
 29 broad variety of spliced transcript isoforms. To systematically study the HBV splice variants, we  
 30 transfected the human hepatoma cells Huh7 with 4 HBV genotypes (A2, B2, C2, and D3),  
 31 followed by deep RNA-sequencing. We found that 12-25% of HBV RNAs were splice variants,  
 32 which were reproducibly detected across independent biological replicates. This accounted for a  
 33 total of 6 novel and 6 previously identified splice variants. In particular, 2 highly abundant novel  
 34 splice variants, in which we called the putative splice variants 1 and 5 (pSP1 and pSP5), were  
 35 specifically expressed at high levels in genotypes D3 and B2, respectively. In general, the HBV  
 36 splicing profiles varied across the genotypes except for the known spliced pgRNAs SP1 and SP9,  
 37 which were present in all 4 major genotypes. Counterintuitively, these singly spliced SP1 and  
 38 SP9 had a suboptimal 5' splice site, suggesting that splicing of HBV RNAs is tightly controlled  
 39 by the viral post-transcriptional regulatory RNA element.

40

41

42

43

44

## 45 **IMPORTANCE**

46 HBV infection affects over 257 million people worldwide. HBV is a major cause of liver  
 47 diseases including cancer and there is no cure. Some HBV RNAs are spliced variants and their  
 48 roles are largely unclear, although some splice variants have been previously found to be  
 49 associated with liver cancer. HBV exists as 9 genotypes worldwide with marked differences in  
 50 replicative capacity and disease sequelae. Whether HBV splice variants vary for the different  
 51 genotypes is yet to be investigated in depth. Here we sequenced RNAs from 4 major HBV  
 52 genotypes using a cell culture system. We found 6 new and 6 previously known splice variants  
 53 across these genotypes. Some novel splice variants were present at high levels, suggesting they  
 54 could be functionally important. Interestingly, although HBV has adapted to human hosts for  
 55 over 50,000 years, the most frequently spliced location shared little flanking sequence similarity  
 56 with that of humans.

57

58

59

60

61

62

63

64

65

66

## 67 INTRODUCTION

68 Hepatitis B virus is a common human pathogen that is a major cause of liver cirrhosis and liver  
69 cancer. The genomic DNA of HBV is approximately 3.2kb, but can be transcribed into the  
70 greater than genome length pregenomic RNA (pgRNA) and preC RNA (pcRNA) (1). The  
71 pgRNA encodes the core (C) and polymerase (P) proteins, whereas the pcRNA encodes the  
72 pre-core (PC) protein that is subsequently processed into the Hepatitis B e Antigen (HBeAg).  
73 The HBV genome is also transcribed into several subgenomic transcripts, namely the preS1,  
74 preS2, S, and X mRNAs. The preS1, S2, and S mRNAs encode the 3 surface (S) structural  
75 proteins of the HBV particles and subviral particles (HBsAg). The X mRNA encodes the HBx  
76 protein.

77

78 Many strains of HBV have arisen from distinct geographical distributions of the world. This is  
79 partly due to the long history of virus-host coevolution (over 50,000 years) and the lack of  
80 proofreading function of the viral reverse transcriptase (2–4). These strains were grouped into 9  
81 major genotypes (A to I) and putative J, and about 30 sub-genotypes (4, 5). There are marked  
82 differences in replication phenotype and disease natural history across HBV genotypes (6, 7), yet  
83 the pathogenicity of different HBV genotypes and their implications for treatment are still not  
84 fully understood. For example, it is possible that severe liver injury caused by genotype C is  
85 related to its high replication capacity (8), and/or its more frequent mutations at the basal core  
86 promoter and pre-core regions (9, 10).

87

88 In addition, different HBV genotypes may produce distinct spliced transcript isoforms whose  
89 precise roles are largely unknown (11–14). At least 17 spliced transcripts of pgRNA (14–26) and  
90 4 spliced transcripts of preS2/S (27, 28) were identified in various sources including liver, serum,  
91 and transfected cells. Interestingly, a recent study showed that HBV RNA splicing is more  
92 efficient in human hepatoma cells than other tested cell-types (14). Furthermore, spliced pgRNA  
93 SP1 is the most commonly detected (16, 17, 19, 21, 29–33), although SP3 and SP9 have also  
94 been commonly observed in some studies (13, 14, 26).

95

96 Notably, HBV splice variants can be encapsidated to form defective viral particles, with  
97 replication and envelopment requiring polymerase and envelope proteins supplied *in trans* by  
98 wild-type HBV (18, 20, 21, 34). The SP1 transcript also encodes the Hepatitis B Spliced Protein  
99 (HBSP) (29), as well as a truncated (by 1 amino acid) PC p22 protein that inhibited wild-type  
100 HBV replication by interfering with wild-type capsid assembly (35). The HBSP is a fusion  
101 product of the first 46 amino acid residues of the P protein and 47 amino acid residues from a  
102 distinct reading frame. A recent breakthrough study showed that HBSP could reduce liver  
103 inflammation *in vivo* (33). Three other splice variants that have coding potential are SP7, SP10  
104 and SP13. SP7 encodes the Hepatitis B Doubly Spliced Protein (HBDSP), a putative pleiotropic  
105 activator (36), whereas SP13 encodes the Polymerase-Surface Fusion Protein (P-S FP), a  
106 structural protein that could substitute the large HBV surface protein (37). This fusion protein  
107 could inhibit HBV replication and may play a role in persistent infection. Interestingly, SP10  
108 could also act as a functional RNA that reduces wild-type HBV replication through interaction  
109 with TATA box binding protein (38).

110

111 An increasing number of studies has shown that the HBV splice variants are associated with the  
 112 development and recurrence of hepatocellular carcinoma (32, 39, 40), and poor response to  
 113 interferon treatment (24). Therefore, we aimed to utilise RNA-seq on cells that had been  
 114 transfected with replication competent clones of different HBV genotypes to (i) quantify the  
 115 composition of splice variants at the RNA level, (ii) investigate the effects of sequence variations  
 116 on splicing efficiency, (iii) determine the usage of splice sites, and (iv) understand the host  
 117 response to viral replication across the major HBV genotypes A to D.

118

119

120

121

122

123

124

125

126

127

128

129

130

131

## 132 RESULTS AND DISCUSSION

### 133 Six of 12 HBV splice variants detected were novel transcripts

134 HBV genotypes A to D expressed a large proportion of spliced transcript isoforms, representing  
 135 12-25% of the HBV transcriptomes detected (Fig 1A), showing that HBV splicing was indeed  
 136 widespread across the genotypes. HBV genotype B2 expressed the highest level of HBV  
 137 transcriptome, followed by A2, C2, and D3 [5830, 5365, 4783, and 4286 TPM (Transcripts Per  
 138 kilobase Million mapped reads), respectively; see also Supplementary Fig S1 and Table S1 in  
 139 read counts].

140

141 A total of 12 splice variants were consistently detected across independent biological replicates  
 142 with high confidence (Fig 1B). In particular, we only reported the splice variants with complete,  
 143 exact match intron chains across independent biological replicates, which were supported by  
 144 over 10 reads mapped across the splice junctions, indicating spliced reads (Fig 2, and  
 145 Supplementary Table S2 and S3). Six out of 12 splice variants were novel. In particular, 2  
 146 putative splice variants, pSP1 and pSP5 were expressed at high levels in genotypes D3 and B2,  
 147 respectively. The importance of these 2 highly abundant novel splice variants requires further  
 148 investigation.

149

150 We also identified previously reported splice variants SP1, 5, 6, 7, 9 and 13\*\* across the HBV  
 151 genotypes (11, 14, 24, 38) (Fig 1B and 2). Notably, SP1 and SP9 were consistently detected in all  
 152 the genotypes. SP1 was the major spliced transcript detected, ranging from 7 to 16% of the HBV  
 153 transcriptomes, which is in agreement with previous findings (11, 13, 41). SP9 was the second

154 most abundant spliced transcript, ranging from 1 to 5% of the HBV transcriptomes. However, the  
155 role of SP9 is still unclear. SP13\*\* was previously identified as a novel splice variant, and we  
156 were able to detect it across genotypes A2, B2 and D3 at high levels. In addition, SP6 and SP7  
157 were detected in 3 major genotypes (A2, B2 and D3, and A2, C2 and D3, respectively). While  
158 any function is yet to be attributed to SP6 or SP13\*\*, SP7 encodes a putative pleiotropic  
159 activator (HBDSP) that has been shown to increase replication of wild-type HBV in  
160 co-transfection cell culture experiments (36).

161

## 162 **Sequence variations surrounding the HBV splice sites affected splicing efficiency**

163 We next investigated whether the sequence contexts of splice sites contributed to the different  
164 types and abundance of splice variants observed across genotypes. MaxEntScan scoring of the  
165 HBV splice sites showed that sequence variation affected the strength of the splice sites of the  
166 different HBV genotypes (Fig 2 and Supplementary Table S3).

167

168 In general, splice sites with weak sequence contexts (negative MaxEntScan scores) were less  
169 likely to be used for splicing and vice versa. For example, the splice donor site at position 2087  
170 in genotypes A2 and D3 had poor sequence contexts and spliced reads associated with this site  
171 were not detected (see ① in Fig 2 and Supplementary Table S3). In contrast, the same donor  
172 position in genotypes B2 and C3 had strong sequence contexts and were supported by over 100  
173 spliced reads. This indicates that the splicing efficiencies of the HBV RNAs are strongly  
174 influenced by the HBV sequence variants surrounding the splice sites.

175



176 However, we also observed a discordance between splice site sequence contexts and splice read  
177 counts. For example, all the genotypes had similar scores at the splice acceptor position 1385 but  
178 the splice read counts were markedly different (see ② in Fig 2 and Supplementary Table S3). In  
179 particular, the most frequently used 5' splice site which was used for SP1 and SP9 had a negative  
180 MaxEntScan score (see ③ or position 2447 in Fig 2 and Supplementary Table S3). These results  
181 suggest that the splicing of this splice junction may be controlled by other *cis*-regulatory  
182 elements, such as the HBV post-transcriptional regulatory RNA element (PRE) (1). Indeed,  
183 deleting a PRE component called the splicing regulatory element-1 (SRE-1) was previously  
184 found to inhibit pgRNA splicing and the production of SP1 (41). Regulation of alternative  
185 splicing may play a crucial role in viral-host interactions (42).

186

#### 187 **HBV encoded more alternative 3' splice sites than 5' splice sites**

188 A closer examination of the HBV splicing profiles revealed that HBV encoded more alternative  
189 3' splice sites than 5' splice sites. (Fig 3A and Supplementary Table S3). Indeed, a trend was  
190 observed for more spliced reads mapped across the 5' splice sites than 3' splice sites, which  
191 reached statistical significance for HBV genotype B2. In contrast, host RNAs had balanced  
192 numbers of 5' and 3' splice sites (53,009 and 52,998, respectively), as well as the supported read  
193 counts (Fig 3, median read counts of 87 for both the 5' and 3' splice sites).

194

195 To quantify the rates of splicing in HBV versus host cell RNAs, we calculated the completed  
196 Splicing Index (coSI) of the 5' and 3' splice sites. The 5' splice sites of HBV showed higher coSI  
197 scores than 3' splice sites (9% versus 5% on average; see also Fig 3B). In contrast, splicing was

198 87% and 86% completed at the host 5' and 3' splice sites, respectively. These results showed that  
199 the 5' splice sites of HBV tend to be more frequently spliced than 3' splice sites (e.g. see ② in  
200 Fig 2), but were much less efficiently utilised than host splice sites.

201

202 To identify the key differences between the HBV and human splice sites, we compared their  
203 splice site contexts using WebLogo (43), which used the frequencies of the uniquely mapped  
204 spliced reads to estimate the most frequently used splice sites. This approach showed that the  
205 nucleotide frequency distributions of human splice sites were similar to previous studies (Fig 4)  
206 (44). Notably, the most frequently used splice sites differed between the virus and host, e.g. –1  
207 positions of the splice donor sites (Fig 4, left panel, U versus G shaded in gray). The differences  
208 between the HBV genotypes were marginal, as the spliced reads were predominantly mapped to  
209 SP1 and SP9 (Fig 1B and 2).

210

## 211 **HBV replication had little effect on the host gene expression**

212 To understand the impact of HBV replication on the host, we carried out differential gene  
213 expression analysis using DESeq2 (45). We found that only one and 12 genes were significantly  
214 differentially expressed in A2 and B2 treated samples, respectively (Fig 5, red points; Fig 6 and  
215 Supplementary Table S6, FDR-adjusted  $p$ -value  $<0.05$ ). Interestingly, both the A2 and B2  
216 genotypes also showed higher levels of HBV transcriptomes (Fig S1; see also Supplementary  
217 Table S1 and S2). The accumulation of HBV transcripts may induce a stress response as the  
218 stress-related genes INHBE, FAM129A, SESN2, ASNS, and CHAC1 were all upregulated (Fig  
219 7; see also the functional annotation results in Supplementary Table S7). Indeed, previous studies

220 have also shown that HBV infection could lead to endoplasmic reticulum stress (46–48),  
221 including upregulation of INHBE (49). Interestingly, 3 significantly upregulated genes (ADM2,  
222 AKNA, and SH3BP2) were previously shown to correlate with the Ishak fibrosis stage (50).

223

## 224 **Concluding remarks**

225 Our study has used RNA-seq to identify the type and proportion of splice variants produced for  
226 HBV genotypes A2, B2, C2 and D3, with a higher degree of sensitivity than 454 sequencing and  
227 conventional reverse-transcription PCR (13, 14, 21, 24), all of which require an intervening step  
228 to generate cDNA, followed by PCR. We identified a number of novel splice variants across  
229 HBV genotypes as well as previously identified variants of yet unknown functions. The role of  
230 the SP9 variant in particular needs to be further explored. We acknowledge that this study is  
231 limited to one clone for each of the genotypes, and needs to be expanded to include additional  
232 HBV genotypes. Nonetheless, this study demonstrates that HBV has a large capacity for  
233 alternative splicing likely controlled by *cis*-acting elements such as the PRE (1), which results in  
234 high-levels of SP1 and SP9 mRNAs, despite the suboptimal context of the 5' splice site. With up  
235 to 25% of all HBV mRNAs being of splice origin, the importance of these molecules in the HBV  
236 “life-cycle” and pathogenesis requires further investigation.

237

238

239

240

241

## 242 MATERIALS AND METHODS

### 243 Cell culture

244 Cell culture and transfection experiments were carried out as previously described with the  
 245 following modifications (6). Huh7 cells were seeded in 6-well plates at partial confluence. After  
 246 overnight incubation, the cells were transiently transfected with pUC57 constructs harboring  
 247 1.3-mer HBV genomes (genotypes A2, B2, C2, and D3) using FuGene 6 transfection reagent  
 248 according to the manufacturer's instructions (Promega, WI, USA). The generation of plasmids  
 249 has been previously described and this transient expression system relies on the endogenous  
 250 promoters of HBV for transcription (6). The empty pUC57 vector was used as a control. Two  
 251 independent biological replicates were performed which included 2 technical replicates for each  
 252 treatment.

253

### 254 RNA-seq

255 Total RNA samples were purified using RNeasy kit (Qiagen, Hilden, Germany) and submitted to  
 256 the Otago Genomics and Bioinformatics Facility at the University of Otago (Dunedin, New  
 257 Zealand) under contract for library construction and sequencing. The libraries were prepared  
 258 using TruSeq stranded Total RNA sample preparation kit with Ribo-Zero according to the  
 259 manufacturer's protocol and sequenced using HiSeq 2500 (Illumina, CA, USA), generating  
 260 125-bp paired-end reads (see the RNA-seq analysis workflow in Fig 7).

261

### 262 Quality control (QC) of RNA-seq

263 The fastq files were examined using FastQC v0.11.5 (51). Most files passed most of the analysis  
 264 modules except ‘per base sequence content’, ‘sequence duplication levels’, and ‘k-mer content’,  
 265 which are common warnings for Illumina TruSeq reads (FastQC documentation). However,  
 266 some fastq files failed at per base sequence quality and per base N content due to diminish of the  
 267 quality score over position 100. Some fastq files also failed at per tile sequence quality due to  
 268 loss of quality at random positions and cycles, which is likely due to the overloading of flowcell.  
 269 Both of these issues should have minimum impact on downstream analysis because the regions  
 270 of poor based calling were soft-clipped during alignment. In addition, only uniquely mapped  
 271 reads were used for gene counting and transcript assembly.

272

273 As a post-alignment QC, the mapping statistics of the non-redundant RNA-seq reads were  
 274 examined. About 60% of the reads were uniquely mapped reads to the human genomes  
 275 (Supplementary Table S4). The distribution of aligned reads was then analyzed using the  
 276 CollectRnaSeqMetrics mode of Picard 2.10.2 (<http://broadinstitute.github.io/picard>; Broad  
 277 Institute, Cambridge, MA, USA). Over 55% and 27% of the bases of these reads were mapped  
 278 the coding sequences (CDS) and untranslated regions (UTRs), respectively. Only 10% or lower  
 279 of the bases of the sequencing reads were aligned to intronic or intergenic regions  
 280 (Supplementary Table S5). These metrics are comparable with previous findings (52), indicating  
 281 that our RNA-seq libraries are reliable.

282

283 **Sequence alignment**

284 Adapter sequences were trimmed from the RNA-seq reads using Skewer v0.2.2 (53). To detect  
285 novel splice junctions, alignment was performed using STAR 2.5.2a in 2-pass mode (54).  
286 Duplicated reads were removed and uniquely mapped reads were retained using SAMtools (55).

287

## 288 **Transcriptome assembly**

289 Transcriptome assembly of HBV splice variants was carried out using StringTie v1.3.3b (56).  
290 This tool assembles and quantifies spliced transcript isoforms using a network flow algorithm.  
291 Annotations of the spliced transcript isoforms were merged by biological replicates using  
292 gtfmerge (<https://github.com/Kingsford-Group/rnaseqtools>) and GffCompare (57). Only the  
293 assembled spliced transcripts that were found in both biological replicates were reported  
294 (intersection of complete, exact match intron chain). After merging the BAM files by biological  
295 replicates using SAMtools, a spliced graph of HBV transcripts was plotted using Gviz and  
296 GenomicFeatures (58, 59).

297

## 298 **Splice site analysis**

299 Splice site sequence contexts were scored using MaxEntScan (60). This tool is a key plugin of  
300 the Ensembl Variant Effect Predictor (61) and performed the best in a recent benchmark (62).  
301 Splice site mapping frequencies were parsed from the SJ.out.tab file from STAR. IPSA was used  
302 to calculate the coSI score of 5' and 3' splice sites (<https://github.com/pervouchine/ipsa>) (63).  
303 WebLogo 3.5.0 was used to plot the nucleotide frequencies surrounding the splice sites.

304

## 305 **Differential gene expression analysis**

306 To examine the reproducibility of the biological replicates, the uniquely mapped reads were first  
 307 counted and summarized at the gene level using mmquant v1.3 (64). The correlation of samples  
 308 was analyzed. The Spearman's correlations between the biological replicates were  $>0.9$ ,  
 309 suggesting a good reproducibility (Supplementary Fig S2). However, the Spearman's  
 310 correlations between biological replicates were smaller than those within the same batch (e.g.  
 311 A2\_rep1 versus A2\_rep2 is 0.938, whereas A2\_rep1 versus B2\_rep1 is 0.996). These results  
 312 suggest the presence of batch effects, which is likely due to the second biological replicate being  
 313 performed a year after. This was further examined using principal component analysis (PCA).  
 314 Indeed, the samples were clustered by batches (Supplementary Fig S3).

315

316 To resolve the issue of batch effects, read counts were transformed using the vst  
 317 (variance-stabilizing transformation) function of DESeq2 (45). Transformed read counts were  
 318 examined using the plotPCA function of DESeq2, before and after correction using the  
 319 removeBatchEffect function of limma (65). To take batch effects into account, differential  
 320 expression analysis was carried out using batch as a linear term in the DESeqDataSetFromMatrix  
 321 function. Differentially expressed genes were examined using DAVID functional annotation  
 322 tools v6.8 (66, 67).

323

## 324 **Statistical analysis**

325 Welch two-sample t-test and permutation test were performed using the exactRankTests R  
 326 package (68, 69). Plotting was carried out using ggplot2 unless otherwise stated (70).

327

## 328 **Code and data availability**

329 The raw RNA-seq libraries are available on Gene Expression Omnibus (71) (GSE155983).

330 Scripts and data for the analysis can be found at

331 [https://github.com/lscs12345/HBV\\_splicing\\_paper\\_2020](https://github.com/lscs12345/HBV_splicing_paper_2020)

332

## 333 **ACKNOWLEDGMENTS**

334 CMB and CSL were funded by the University of Otago. CSL is a recipient of a Dr. Sulaiman

335 Daud 125th Jubilee Postgraduate Scholarship and the Marjorie McCallum travel award. PR and

336 VS were funded by the NHMRC grant APP1145977.

337

## 338 **COMPETING INTERESTS**

339 The authors declare that they have no competing interests.

340

## 341 **REFERENCES**

- 342 1. Lim CS, Brown CM. 2016. Hepatitis B virus nuclear export elements: RNA stem-loop  $\alpha$   
343 and  $\beta$ , key parts of the HBV post-transcriptional regulatory element. *RNA Biol* 13:743–747.
- 344 2. Krause-Kyora B, Susat J, Key FM, Kühnert D, Bosse E, Immel A, Rinne C, Kornell S-C,  
345 Yepes D, Franzenburg S, Heyne HO, Meier T, Lösch S, Meller H, Friederich S, Nicklisch  
346 N, Alt KW, Schreiber S, Tholey A, Herbig A, Nebel A, Krause J. 2018. Neolithic and  
347 medieval virus genomes reveal complex evolution of hepatitis B. *Elife* 7.
- 348 3. Yuen LKW, Littlejohn M, Duchêne S, Edwards R, Bukulatjpi S, Binks P, Jackson K, Davies  
349 J, Davis JS, Tong SYC, Locarnini S. 2019. Tracing Ancient Human Migrations into Sahul



- 350 Using Hepatitis B Virus Genomes. *Mol Biol Evol* 36:942–954.
- 351 4. Revill PA, Tu T, Netter HJ, Yuen LKW, Locarnini SA, Littlejohn M. 2020. The evolution  
352 and clinical impact of hepatitis B virus genome diversity. *Nat Rev Gastroenterol Hepatol*.
- 353 5. McNaughton AL, Revill PA, Littlejohn M, Matthews PC, Ansari MA. 2020. Analysis of  
354 genomic-length HBV sequences to determine genotype and subgenotype reference  
355 sequences. *J Gen Virol* 101:271–283.
- 356 6. Sozzi V, Walsh R, Littlejohn M, Colledge D, Jackson K, Warner N, Yuen L, Locarnini SA,  
357 Revill PA. 2016. In Vitro Studies Show that Sequence Variability Contributes to Marked  
358 Variation in Hepatitis B Virus Replication, Protein Expression, and Function Observed  
359 across Genotypes. *J Virol* 90:10054–10064.
- 360 7. Kramvis A. 2014. Genotypes and genetic variability of hepatitis B virus. *Intervirology*  
361 57:141–150.
- 362 8. Kao J-H. 2011. Molecular epidemiology of hepatitis B virus. *Korean J Intern Med*  
363 26:255–261.
- 364 9. Kramvis A, Kostaki E-G, Hatzakis A, Paraskevis D. 2018. Immunomodulatory Function of  
365 HBeAg Related to Short-Sighted Evolution, Transmissibility, and Clinical Manifestation of  
366 Hepatitis B Virus. *Front Microbiol* 9:2521.
- 367 10. Chotiyaputta W, Lok ASF. 2009. Hepatitis B virus variants. *Nat Rev Gastroenterol Hepatol*  
368 6:453–462.
- 369 11. Lee GH, Wasser S, Lim SG. 2008. Hepatitis B pregenomic RNA splicing--the products, the  
370 regulatory mechanisms and its biological significance. *Virus Res* 136:1–7.
- 371 12. Candotti D, Allain J-P. 2016. Biological and clinical significance of hepatitis B virus RNA

- 372        splicing: an update. *Ann Blood* 2:6–6.
- 373 13. Huang C-C, Kuo T-M, Yeh C-T, Hu C-P, Chen Y-L, Tsai Y-L, Chen M-L, Chou Y-C, Chang  
374        C. 2013. One single nucleotide difference alters the differential expression of spliced RNAs  
375        between HBV genotypes A and D. *Virus Res* 174:18–26.
- 376 14. Ito N, Nakashima K, Sun S, Ito M, Suzuki T. 2019. Cell Type Diversity in Hepatitis B Virus  
377        RNA Splicing and Its Regulation. *Front Microbiol* 10:207.
- 378 15. Sommer G, van Bömmel F, Will H. 2000. Genotype-specific synthesis and secretion of  
379        spliced hepatitis B virus genomes in hepatoma cells. *Virology* 271:371–381.
- 380 16. Chen PJ, Chen CR, Sung JL, Chen DS. 1989. Identification of a doubly spliced viral  
381        transcript joining the separated domains for putative protease and reverse transcriptase of  
382        hepatitis B virus. *J Virol* 63:4165–4171.
- 383 17. Su TS, Lai CJ, Huang JL, Lin LH, Yauk YK, Chang CM, Lo SJ, Han SH. 1989. Hepatitis B  
384        virus transcript produced by RNA splicing. *J Virol* 63:4011–4018.
- 385 18. Terré S, Petit MA, Bréchet C. 1991. Defective hepatitis B virus particles are generated by  
386        packaging and reverse transcription of spliced viral RNAs in vivo. *J Virol* 65:5539–5543.
- 387 19. Wu HL, Chen PJ, Tu SJ, Lin MH, Lai MY, Chen DS. 1991. Characterization and genetic  
388        analysis of alternatively spliced transcripts of hepatitis B virus in infected human liver  
389        tissues and transfected HepG2 cells. *J Virol* 65:1680–1686.
- 390 20. Rosmorduc O, Petit MA, Pol S, Capel F, Bortolotti F, Berthelot P, Brechet C, Kremsdorf D.  
391        1995. In vivo and in vitro expression of defective hepatitis B virus particles generated by  
392        spliced hepatitis B virus RNA. *Hepatology* 22:10–19.
- 393 21. Günther S, Sommer G, Iwanska A, Will H. 1997. Heterogeneity and common features of

- 394 defective hepatitis B virus genomes derived from spliced pregenomic RNA. *Virology*  
395 238:363–371.
- 396 22. Abraham TM, Lewellyn EB, Haines KM, Loeb DD. 2008. Characterization of the  
397 contribution of spliced RNAs of hepatitis B virus to DNA synthesis in transfected cultures  
398 of Huh7 and HepG2 cells. *Virology* 379:30–37.
- 399 23. El Chaar M, El Jisr T, Allain J-P. 2012. Hepatitis B virus DNA splicing in Lebanese blood  
400 donors and genotype A to E strains: implications for hepatitis B virus DNA quantification  
401 and infectivity. *J Clin Microbiol* 50:3159–3167.
- 402 24. Chen J, Wu M, Wang F, Zhang W, Wang W, Zhang X, Zhang J, Liu Y, Liu Y, Feng Y, Zheng  
403 Y, Hu Y, Yuan Z. 2015. Hepatitis B virus spliced variants are associated with an impaired  
404 response to interferon therapy. *Sci Rep* 5:16459.
- 405 25. Lam AM, Ren S, Espiritu C, Kelly M, Lau V, Zheng L, Hartman GD, Flores OA, Klumpp  
406 K. 2017. Hepatitis B Virus Capsid Assembly Modulators, but Not Nucleoside Analogs,  
407 Inhibit the Production of Extracellular Pregenomic RNA and Spliced RNA Variants.  
408 *Antimicrob Agents Chemother* 61.
- 409 26. Betz-Stablein BD, Töpfer A, Littlejohn M, Yuen L, Colledge D, Sozzi V, Angus P,  
410 Thompson A, Revill P, Beerenwinkel N, Warner N, Luciani F. 2016. Single-Molecule  
411 Sequencing Reveals Complex Genome Variation of Hepatitis B Virus during 15 Years of  
412 Chronic Infection following Liver Transplantation. *J Virol* 90:7171–7183.
- 413 27. Hass M, Hannoun C, Kalinina T, Sommer G, Manegold C, Günther S. 2005. Functional  
414 analysis of hepatitis B virus reactivating in hepatitis B surface antigen-negative individuals.  
415 *Hepatology* 42:93–103.

- 416 28. Candotti D, Lin CK, Belkhir D, Sakuldamrongpanich T, Biswas S, Lin S, Teo D, Ayob Y,  
417 Allain J-P. 2012. Occult hepatitis B infection in blood donors from South East Asia:  
418 molecular characterisation and potential mechanisms of occurrence. *Gut* 61:1744–1753.
- 419 29. Soussan P, Tuveri R, Nalpas B, Garreau F, Zavala F, Masson A, Pol S, Brechot C,  
420 Kremsdorf D. 2003. The expression of hepatitis B spliced protein (HBSP) encoded by a  
421 spliced hepatitis B virus RNA is associated with viral replication and liver fibrosis. *J*  
422 *Hepatol* 38:343–348.
- 423 30. Rosmorduc O, Petit M-A, Pol S, Capel F, Bortolotti F, Berthelot P, Brechot C, Kremsdorf D.  
424 1995. In vivo and in vitro expression of defective hepatitis B virus particles generated by  
425 spliced hepatitis B virus RNA. *Hepatology* 22:10–19.
- 426 31. Suzuki T, Kajino K, Masui N, Saito I, Miyamura T. 1990. Alternative splicing of hepatitis B  
427 virus RNAs in HepG2 cells transfected with the viral DNA. *Virology* 179:881–885.
- 428 32. Soussan P, Pol J, Garreau F, Schneider V, Le Pendeven C, Nalpas B, Lacombe K, Bonnard  
429 P, Pol S, Kremsdorf D. 2008. Expression of defective hepatitis B virus particles derived  
430 from singly spliced RNA is related to liver disease. *J Infect Dis* 198:218–225.
- 431 33. Duriez M, Mandouri Y, Lekbaby B, Wang H, Schnuriger A, Redelsperger F, Guerrera CI,  
432 Lefevre M, Fauveau V, Ahodantin J, Quetier I, Chhuon C, Gourari S, Boissonnas A, Gill U,  
433 Kennedy P, Debzi N, Sitterlin D, Maini MK, Kremsdorf D, Soussan P. 2017. Alternative  
434 splicing of hepatitis B virus: A novel virus/host interaction altering liver immunity. *J*  
435 *Hepatol* 67:687–699.
- 436 34. Köck J, Nassal M, Deres K, Blum HE, von Weizsäcker F. 2004. Hepatitis B virus  
437 nucleocapsids formed by carboxy-terminally mutated core proteins contain spliced viral

- 438 genomes but lack full-size DNA. *J Virol* 78:13812–13818.
- 439 35. Wang Y-L, Liou G-G, Lin C-H, Chen M-L, Kuo T-M, Tsai K-N, Huang C-C, Chen Y-L,  
440 Huang L-R, Chou Y-C, Chang C. 2015. The inhibitory effect of the hepatitis B virus  
441 singly-spliced RNA-encoded p21.5 protein on HBV nucleocapsid formation. *PLoS One*  
442 10:e0119625.
- 443 36. Chen W-N, Chen J-Y, Lin W-S, Lin J-Y, Lin X. 2010. Hepatitis B doubly spliced protein,  
444 generated by a 2.2 kb doubly spliced hepatitis B virus RNA, is a pleiotropic activator  
445 protein mediating its effects via activator protein-1- and CCAAT/enhancer-binding  
446 protein-binding sites. *J Gen Virol* 91:2592–2600.
- 447 37. Huang HL, Jeng KS, Hu CP, Tsai CH, Lo SJ, Chang C. 2000. Identification and  
448 characterization of a structural protein of hepatitis B virus: a polymerase and surface fusion  
449 protein encoded by a spliced RNA. *Virology* 275:398–410.
- 450 38. Tsai K-N, Chong C-L, Chou Y-C, Huang C-C, Wang Y-L, Wang S-W, Chen M-L, Chen  
451 C-H, Chang C. 2015. Doubly Spliced RNA of Hepatitis B Virus Suppresses Viral  
452 Transcription via TATA-Binding Protein and Induces Stress Granule Assembly. *J Virol*  
453 89:11406–11419.
- 454 39. Pan M-H, Hu H-H, Mason H, Bayliss J, Littlejohn M, Lin Y-L, Su C-Y, Chiang C-T, Chen  
455 C-J, Locarnini S, Yang H-I, Revill P. 2018. Hepatitis B splice variants are strongly  
456 associated with and are indeed predictive of hepatocellular carcinoma. *J Hepatol*  
457 68:S474–S475.
- 458 40. Bayliss J, Lim L, Thompson AJV, Desmond P, Angus P, Locarnini S, Revill PA. 2013.  
459 Hepatitis B virus splicing is enhanced prior to development of hepatocellular carcinoma. *J*

- 460 Hepatol 59:1022–1028.
- 461 41. Heise T, Sommer G, Reumann K, Meyer I, Will H, Schaal H. 2006. The hepatitis B virus  
462 PRE contains a splicing regulatory element. *Nucleic Acids Res* 34:353–363.
- 463 42. Chauhan K, Kalam H, Dutt R, Kumar D. 2019. RNA Splicing: A New Paradigm in  
464 Host-Pathogen Interactions. *J Mol Biol* 431:1565–1575.
- 465 43. Crooks GE, Hon G, Chandonia J-M, Brenner SE. 2004. WebLogo: a sequence logo  
466 generator. *Genome Res* 14:1188–1190.
- 467 44. Padgett RA. 2012. New connections between splicing and human disease. *Trends Genet*  
468 28:147–154.
- 469 45. Love MI, Huber W, Anders S. 2014. Moderated estimation of fold change and dispersion  
470 for RNA-seq data with DESeq2. *Genome Biol* 15:550.
- 471 46. Montalbano R, Honrath B, Wissniowski TT, Elxnat M, Roth S, Ocker M, Quint K, Churin  
472 Y, Roederfeld M, Schroeder D, Glebe D, Roeb E, Di Fazio P. 2016. Exogenous hepatitis B  
473 virus envelope proteins induce endoplasmic reticulum stress: involvement of cannabinoid  
474 axis in liver cancer cells. *Oncotarget* 7:20312–20323.
- 475 47. Li X, Pan E, Zhu J, Xu L, Chen X, Li J, Liang L, Hu Y, Xia J, Chen J, Chen W, Hu J, Wang  
476 K, Tang N, Huang A. 2018. Cisplatin Enhances Hepatitis B Virus Replication and PGC-1 $\alpha$   
477 Expression through Endoplasmic Reticulum Stress. *Sci Rep* 8:3496.
- 478 48. Liu X, Green RM. 2019. Endoplasmic reticulum stress and liver diseases. *Liver Res*  
479 3:55–64.
- 480 49. Sasaki R, Kanda T, Nakamura M, Nakamoto S, Haga Y, Wu S, Shirasawa H, Yokosuka O.  
481 2016. Possible Involvement of Hepatitis B Virus Infection of Hepatocytes in the

- 482      Attenuation of Apoptosis in Hepatic Stellate Cells. *PLoS One* 11:e0146314.
- 483 50. Wang Q, Lin L, Yoo S, Wang W, Blank S, Fiel MI, Kadri H, Luan W, Warren L, Zhu J,  
484      Hiotis SP. 2016. Impact of non-neoplastic vs intratumoural hepatitis B viral DNA and  
485      replication on hepatocellular carcinoma recurrence. *Br J Cancer* 115:841–847.
- 486 51. Andrews S. 2016. FastQC: A Quality Control tool for High Throughput Sequence Data.
- 487 52. Sultan M, Amstislavskiy V, Risch T, Schuette M, Dökel S, Ralser M, Balzereit D, Lehrach  
488      H, Yaspo M-L. 2014. Influence of RNA extraction methods and library selection schemes  
489      on RNA-seq data. *BMC Genomics* 15:675.
- 490 53. Jiang H, Lei R, Ding S-W, Zhu S. 2014. Skewer: a fast and accurate adapter trimmer for  
491      next-generation sequencing paired-end reads. *BMC Bioinformatics* 15:182.
- 492 54. Dobin A, Davis CA, Schlesinger F, Drenkow J, Zaleski C, Jha S, Batut P, Chaisson M,  
493      Gingeras TR. 2013. STAR: ultrafast universal RNA-seq aligner. *Bioinformatics* 29:15–21.
- 494 55. Li H, Handsaker B, Wysoker A, Fennell T, Ruan J, Homer N, Marth G, Abecasis G, Durbin  
495      R, 1000 Genome Project Data Processing Subgroup. 2009. The Sequence Alignment/Map  
496      format and SAMtools. *Bioinformatics* 25:2078–2079.
- 497 56. Pertea M, Pertea GM, Antonescu CM, Chang T-C, Mendell JT, Salzberg SL. 2015.  
498      StringTie enables improved reconstruction of a transcriptome from RNA-seq reads. *Nat*  
499      *Biotechnol* 33:290–295.
- 500 57. Pertea G, Pertea M. 2020. GFF Utilities: GffRead and GffCompare. *F1000Res* 9:304.
- 501 58. Lawrence M, Huber W, Pagès H, Aboyoun P, Carlson M, Gentleman R, Morgan MT, Carey  
502      VJ. 2013. Software for computing and annotating genomic ranges. *PLoS Comput Biol*  
503      9:e1003118.

- 504 59. Hahne F, Ivanek R. 2016. Visualizing Genomic Data Using Gviz and Bioconductor.  
505 Methods Mol Biol 1418:335–351.
- 506 60. Yeo G, Burge CB. 2004. Maximum entropy modeling of short sequence motifs with  
507 applications to RNA splicing signals. J Comput Biol 11:377–394.
- 508 61. McLaren W, Gil L, Hunt SE, Riat HS, Ritchie GRS, Thormann A, Flicek P, Cunningham F.  
509 2016. The Ensembl Variant Effect Predictor. Genome Biol 17:122.
- 510 62. Jian X, Boerwinkle E, Liu X. 2014. In silico prediction of splice-altering single nucleotide  
511 variants in the human genome. Nucleic Acids Res 42:13534–13544.
- 512 63. Pervouchine DD, Knowles DG, Guigó R. 2013. Intron-centric estimation of alternative  
513 splicing from RNA-seq data. Bioinformatics 29:273–274.
- 514 64. Zytynski M. 2017. mmquant: how to count multi-mapping reads? BMC Bioinformatics  
515 18:411.
- 516 65. Ritchie ME, Phipson B, Wu D, Hu Y, Law CW, Shi W, Smyth GK. 2015. limma powers  
517 differential expression analyses for RNA-sequencing and microarray studies. Nucleic Acids  
518 Res 43:e47.
- 519 66. Huang DW, Sherman BT, Lempicki RA. 2009. Systematic and integrative analysis of large  
520 gene lists using DAVID bioinformatics resources. Nat Protoc 4:44–57.
- 521 67. Huang DW, Sherman BT, Lempicki RA. 2009. Bioinformatics enrichment tools: paths  
522 toward the comprehensive functional analysis of large gene lists. Nucleic Acids Res  
523 37:1–13.
- 524 68. Torsten Hothorn and Kurt Hornik. 2019. exactRankTests: Exact Distributions for Rank and  
525 Permutation Tests. Comprehensive R Archive Network (CRAN).



526 69. R Core Team. 2019. R: A language and environment for statistical computing. R  
527 Foundation for Statistical Computing, Vienna, Austria.

528 70. Wickham H. 2016. ggplot2: Elegant Graphics for Data Analysis. Springer.

529 71. Barrett T, Wilhite SE, Ledoux P, Evangelista C, Kim IF, Tomashevsky M, Marshall KA,  
530 Phillippy KH, Sherman PM, Holko M, Yefanov A, Lee H, Zhang N, Robertson CL, Serova  
531 N, Davis S, Soboleva A. 2013. NCBI GEO: archive for functional genomics data  
532 sets--update. Nucleic Acids Res 41:D991–5.

533

534

535

536

537

538

539

540

541

542

543

544

545

546

547

## 548 **FIGURE LEGENDS**

### 549 **Fig 1. HBV genotypes expressed a wide variety of spliced transcript isoforms. (A)**

550 Proportions of the HBV spliced transcripts. Only the spliced transcripts present in both biological  
551 replicates are shown. **(B)** Relative abundance of the HBV splice variants in genotype A to D. See  
552 also Supplementary Table S1 and S2. TPM, Transcripts Per kilobase Million mapped reads.

553

### 554 **Fig 2. Distinct splicing profiles were observed across the HBV genotypes.** Lollipop plot

555 indicates the positions of splice sites relative to the *EcoRI* site of genotype C2. Blue and red  
556 colors indicate 5' and 3' splice sites, respectively). SP and pSP denote the known and putative  
557 spliced pgRNA transcripts, respectively (splice variants' panel). Black dotted lines denote the  
558 positions of initiation codons of C, P, preS1, and X reading frames (ORFs' panel). Heatmap  
559 shows the abundance of HBV spliced transcripts. Read coverage is shown in gray (coverage  
560 panel, y-axis). Arcs represent RNA-seq reads mapped across the splice junctions (supporting  
561 read counts in red color). Only the splice junctions supported by at least 100 reads are shown.  
562 Blue and red vertical lines indicate the MaxEntScan scores of the 5' and 3' splice sites,  
563 respectively (coverage panel). A positive MaxEntScan score predicts a good splice site sequence  
564 context whereas a negative score predicts a poor splice site sequence context. Three main  
565 scenarios were observed. ① The presence and absence of spliced reads at position 2087 were  
566 predicted by MaxEntScan scores, in which reads were found to map across the 5' splice sites  
567 with strong positive scores (B2 and C2) but not those with strong negative scores (A2 and D3).  
568 ② Varying spliced read counts could not be explained by similar scores. ③ Most spliced reads

were mapped across a weak splice donor site. See also Supplementary Table S3. ORFs, open reading frames.

571

**Fig 3. HBV 5' splice sites are more likely to be spliced than 3' splice sites.** (A) More spliced reads were mapped across the 5' splice sites of HBV than 3' splice sites. Similar results were obtained from Welch two-sample t-test (one-sided) and permutation test (e.g.  $p$ -values of 0.04 and 0.06 were obtained for genotype B2, respectively). Solid black lines indicate median values. (B) Completeness of splicing at the 5' and 3' splice sites. Only the splice sites supported by at least 10 reads were included for comparison. coSI, completed Splicing Index.

578

**Fig 4. Most frequently used splice sites differed between HBV and the host.** The nucleotide frequencies surrounding the splice sites are represented by the spliced reads. Exon boundaries are shaded in gray. Only the splice sites supported by at least 10 reads were included.

582

**Fig 5. MA plots show differential gene expression between the HBV treated and control samples.** Normalized counts indicate the counts divided by the normalization factors (as computed using the DESeq2 default function). Red points denote the FDR-adjusted  $p$ -value of  $<0.05$ . Unfilled triangles denote the genes that have undergone twofold changes in expression. MA plot, log ratio versus mean expression (log scale). See also the related Supplementary Table S6.

589

590 **Fig 6. Significantly dysregulated genes in the HBV treated cells.** A total of 12 genes were  
591 differentially expressed in the B2 treated sample. Circled numbers denote the ranking based on  
592 FDR-adjusted *p*-values. See also Supplementary Table S6 and S7.

593

594 **Fig 7. RNA-seq analysis of the HBV and host transcriptomes.** Quality control (QC) check on  
595 the paired-end RNA-seq libraries was carried out using FastQC. Adapter sequences were  
596 trimmed from the RNA-seq reads using Skewer. Trimmed reads were aligned to the human and  
597 HBV genomes using STAR in 2-pass mode. Duplicated and multi-mapped reads were discarded  
598 from the Binary Alignment Map (BAM) files using SAMtools. Post-alignment QC check was  
599 performed using Picard tools. Transcriptome assembly and quantification were carried out using  
600 StringTie, with a post-processing step focusing on the HBV spliced transcript isoforms. Splice  
601 site sequence contexts were scored using MaxEntScan. Completeness of RNA splicing was  
602 evaluated using IPSA. Reads mapped to human genes were quantified using mmquant, followed  
603 by differential gene expression analysis using DESeq2. A list of differentially expressed genes  
604 was submitted to the DAVID webserver for functional annotation analysis. coSI, completed  
605 Splicing Index.

606

607

608

609

610

611

Fig 1

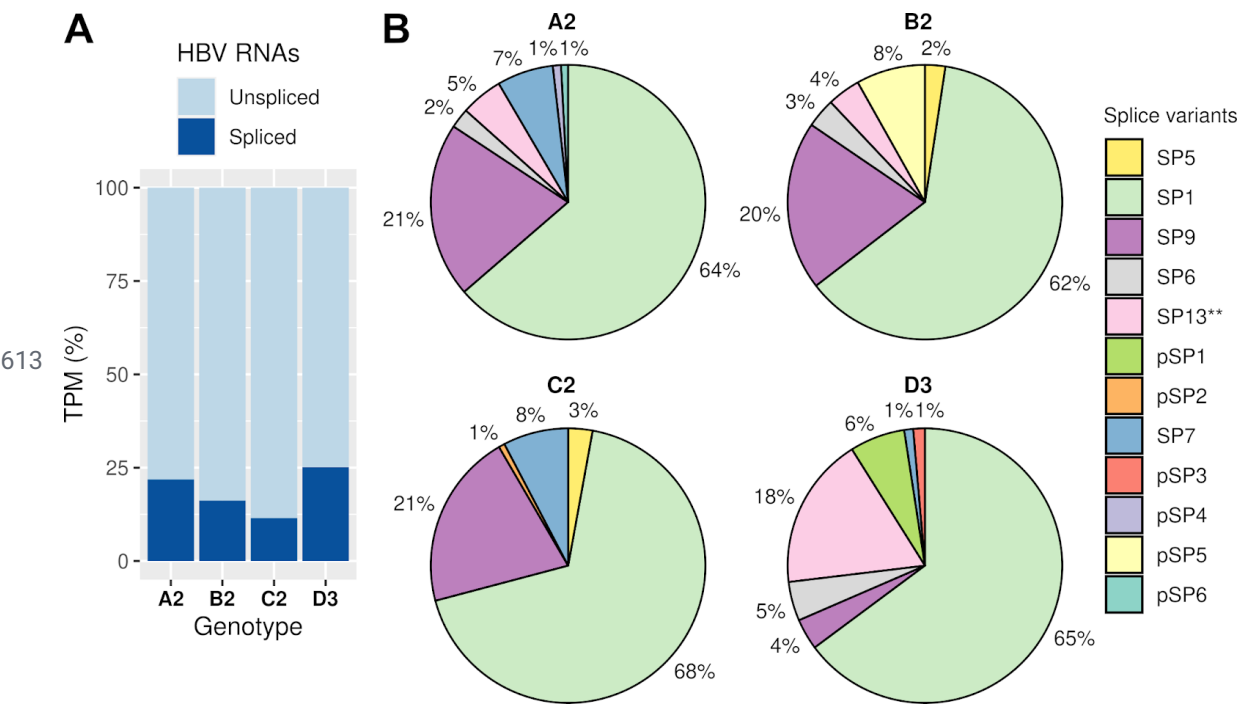

Fig 2

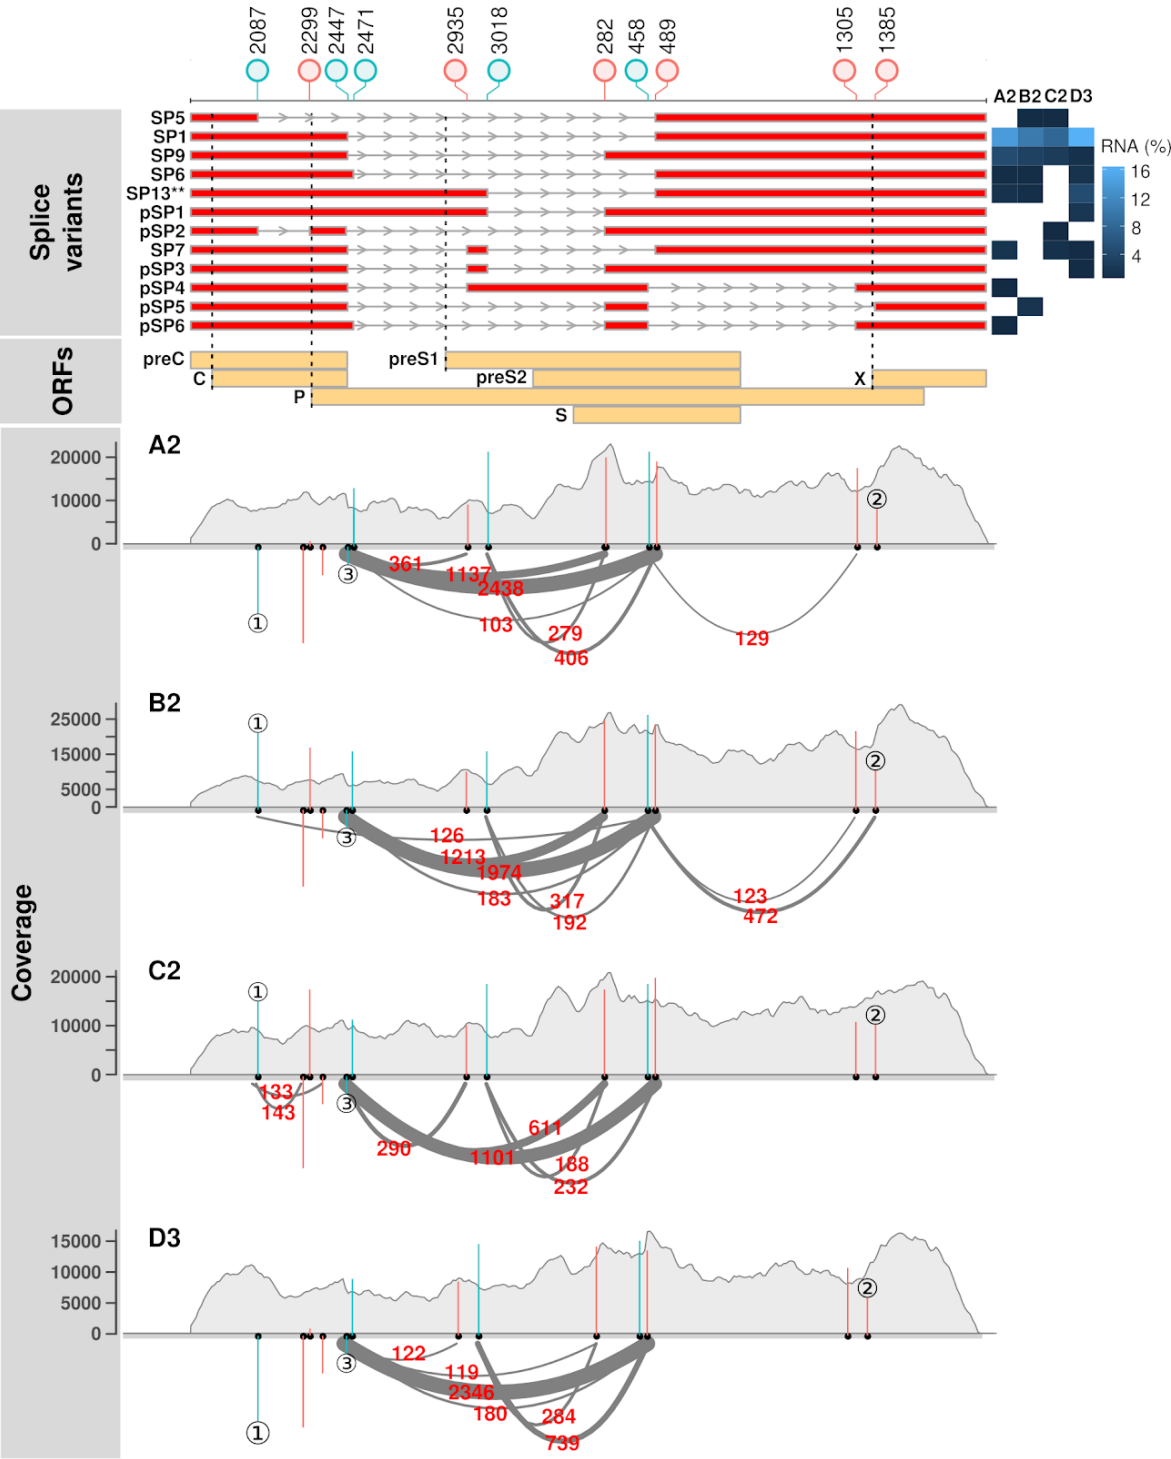

Fig 3

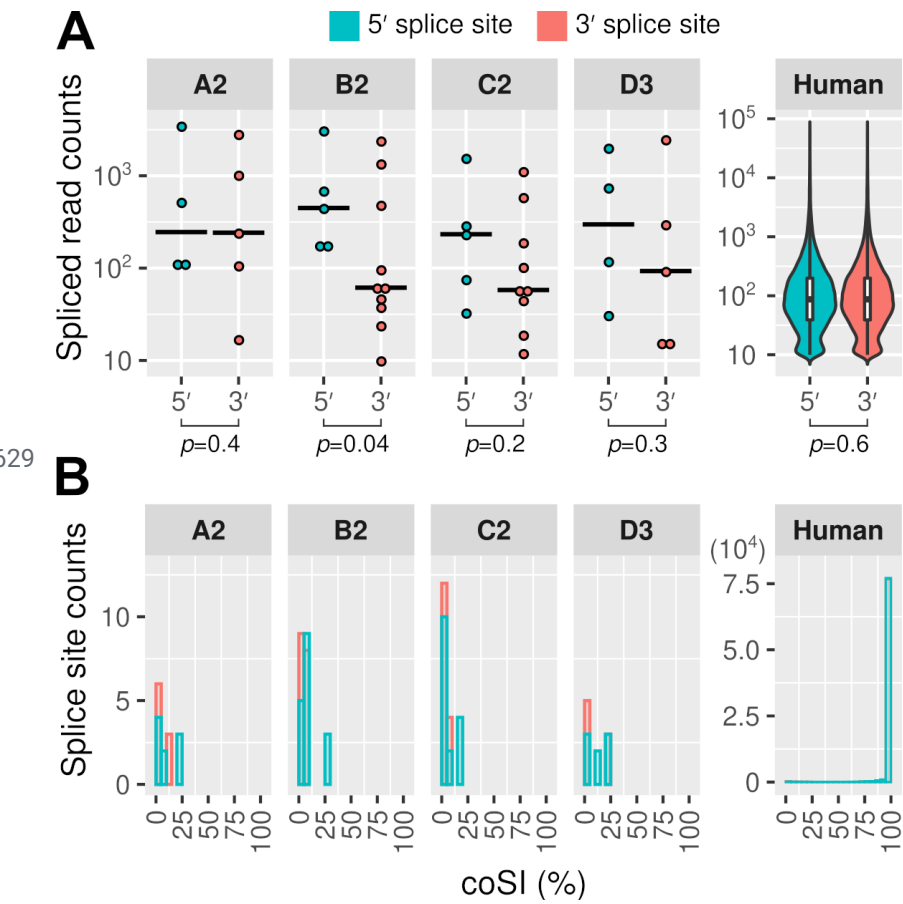

640

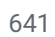

643

644

645

646

647

648



649 **Fig 5**

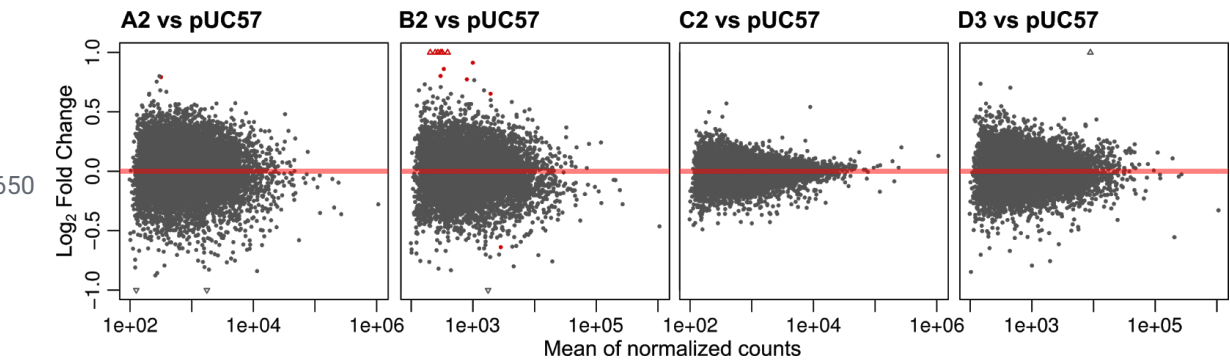

Fig 6

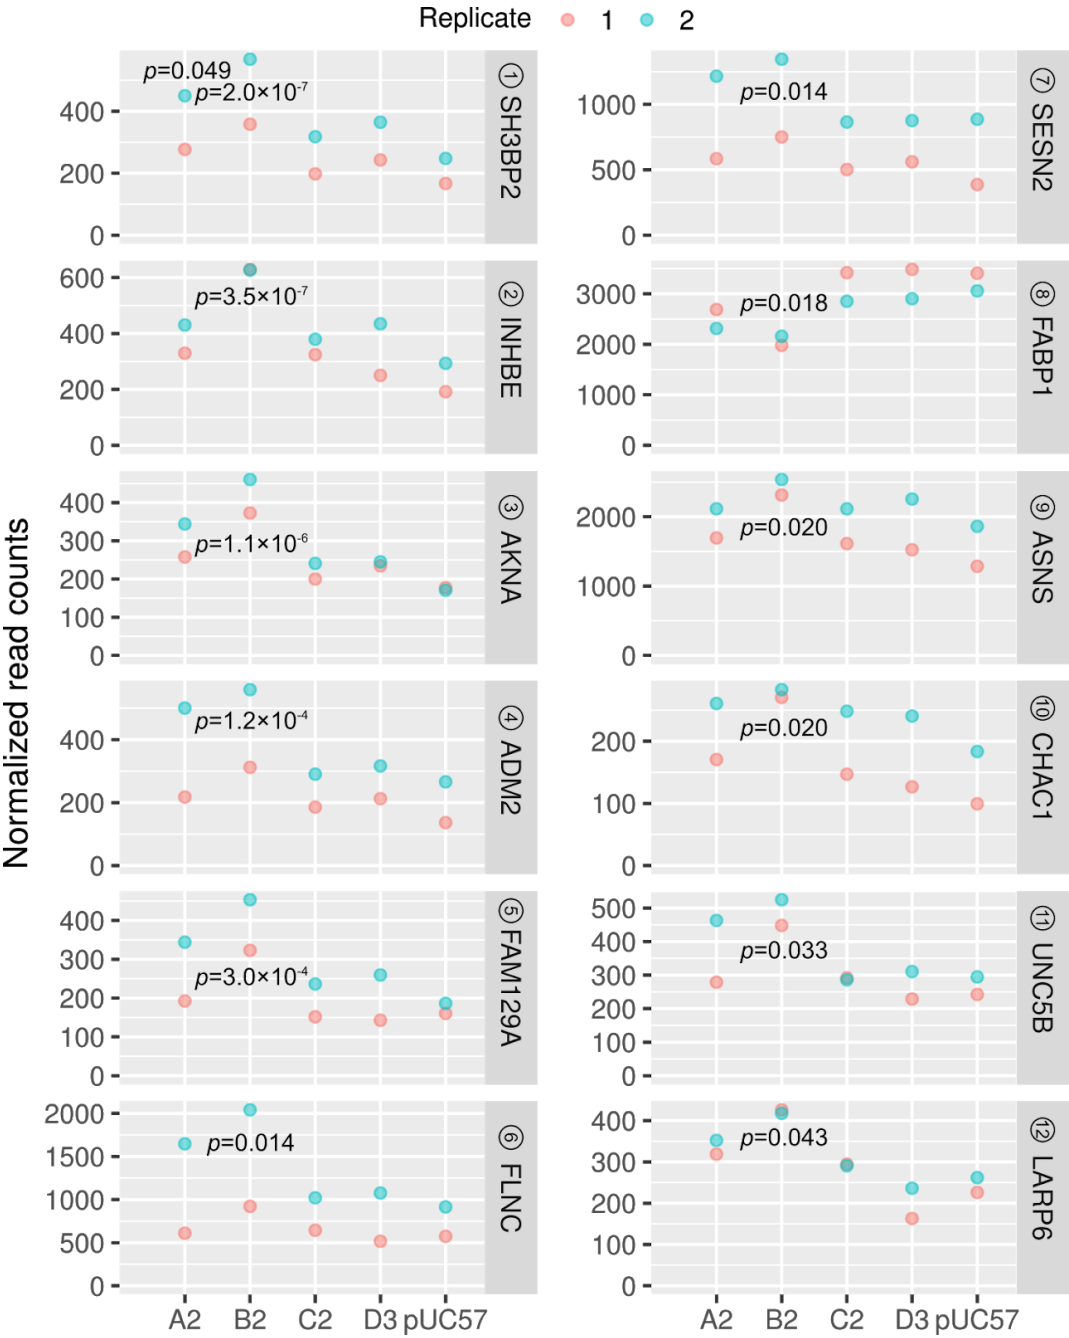

Fig 7

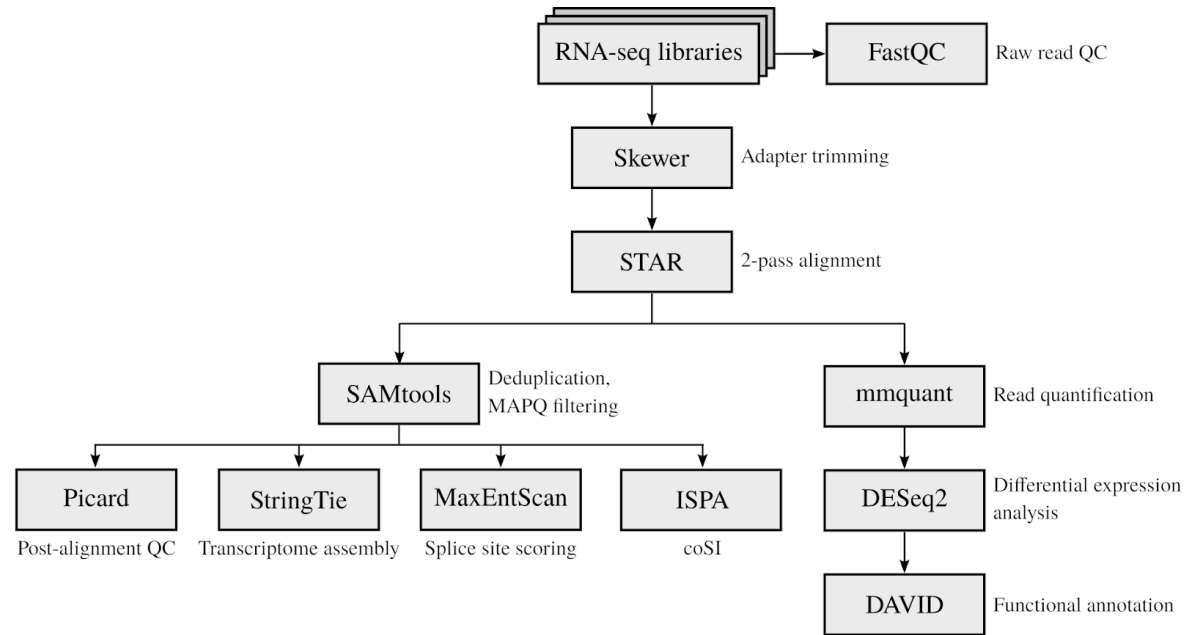

Source: http://biorxiv.org/content/10.1101/2020.08.12.249060v1.full.pdf
